# Supplementary material for: Double-sided 3D printing on paper towards mass production of three-dimensional paper-based microfluidic analytical devices (3D-μPADs)
Source: Royal Society of Chemistry journal article supplement (doi:10.1039/c8lc00367j), 2018-01-01
Supplement: c8lc00367j1.pdf [file c8lc00367j1.pdf]

## Supplementary Information

### **Double-sided 3D printing on paper towards mass production of three-dimensional paper-based microfluidic analytical devices (3D- $\mu$ PADs)**

Chanyong Park<sup>a</sup>, Yong Duk Han<sup>b</sup>, Han Vit Kim<sup>c</sup>, Jinkee Lee<sup>c</sup>, Hyun C. Yoon<sup>b</sup> and Sungsu Park<sup>c\*</sup>

<sup>a</sup>*Department of Biomedical Engineering, Sungkyunkwan University, Suwon 16419, Korea.*

<sup>b</sup>*Department of Molecular Science & Technology, Ajou University, Suwon 16499, Korea*

<sup>c</sup>*School of Mechanical Engineering, Sungkyunkwan University, Suwon 16419, Korea. E-mail: [nanopark@skku.edu](mailto:nanopark@skku.edu)*

*\*Corresponding author: S. Park. School of Mechanical Engineering, Sungkyunkwan University, Seoburo, Jangan-gu, Suwon, Kyunggi-do 16419, Korea/E-mail: [nanopark@skku.edu](mailto:nanopark@skku.edu)/Tel: +82-31-290-7431/Fax: +82-31-290-5889*

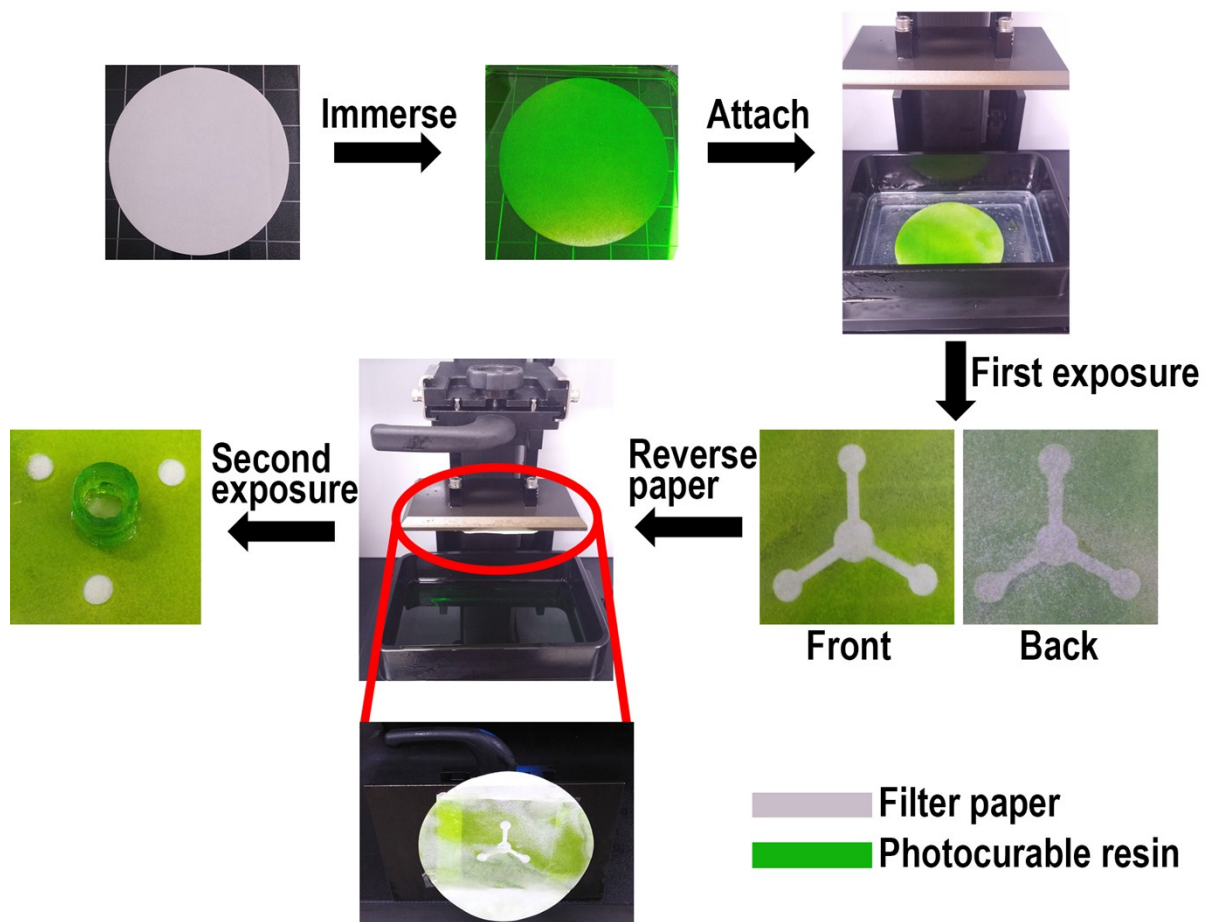

Fig. S1. 3D printing processes for double-sided patterning on the filter paper.

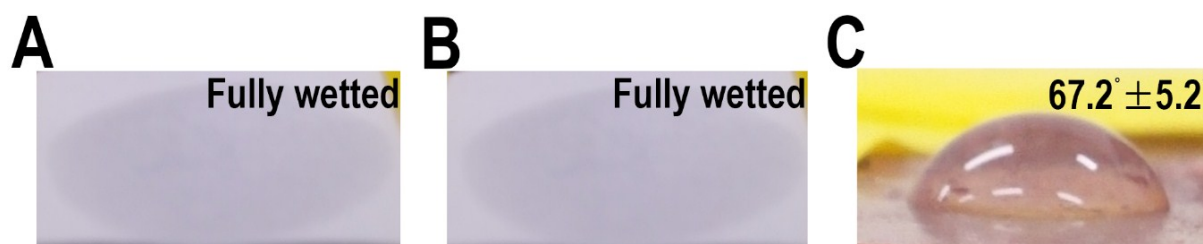

Fig. S2. Water drops on the paper (A), paper after removing the printed resin (B) and paper with the printed resin (C).
